# Supplementary material
Source: publisher figshare collection journal article supplement (https://acs.figshare.com/ndownloader/files/39661257)
Supplement: Supplementary file 1 [file 39661257]

Supporting Information

**Ionic Conduction and Speciation in LiPF<sub>6</sub> and LiBF<sub>4</sub>  
Dimethyl Sulfoxide Electrolytes: Comparison with  
Propylene Carbonate Electrolytes**

Bonhyeop Koo,<sup>†</sup> Hyejin Lee,<sup>†</sup> Sunwook Hwang,<sup>†</sup> and Hochun Lee<sup>\*,†,‡</sup>

<sup>†</sup>Department of Energy Science and Engineering, DGIST, Daegu 42988, Republic of Korea

<sup>‡</sup> Energy Science and Engineering Research Center, DGIST, Daegu 42988, Republic of Korea

\*Corresponding author:

Tel: +82-53-785-6411

Fax: +82-53-785-6409

E-mail: dukelee@dgist.ac.kr

### The classical theory of ionic conductivity

In general, the ionic conductivity of dilute electrolytes is described by the Nernst–Einstein (NE, eq. S1) and Stokes–Einstein (SE, eq. S2) relations:

$$\kappa = \sum \frac{z_i^2 F^2}{RT} D_i c_i \quad (1)$$

$$D_i = \frac{k_B T}{6\pi\eta r_i} \quad (2)$$

where  $z_i$ ,  $D_i$ ,  $c_i$ , and  $r_i$  are the formal charge, diffusion coefficient, concentration, and radius of ionic species  $i$ ,  $\eta$  is the solution viscosity, and the other symbols have their conventional meanings. The NE relation states that ionic conductivity is determined by the concentration and diffusivity of charge carriers, while the SE relation describes that diffusivity is governed by the solution viscosity and the size of the mobile species. Therefore, the two classical theories dictate that low viscosity and a high concentration of charge carriers are prerequisites to achieve facile ion conduction. However, the NE relation often fails in concentrated solutions, where conduction behavior is complicated by the presence of various ion pairs and non-vehicular conduction modes (e.g., hopping or the Grotthuss-type mechanism). Indeed, the NE relation underestimated the conductivity of concentrated LiBF<sub>4</sub>–PC solution in the current work, suggesting the emergence of ion hopping conduction.<sup>1</sup>

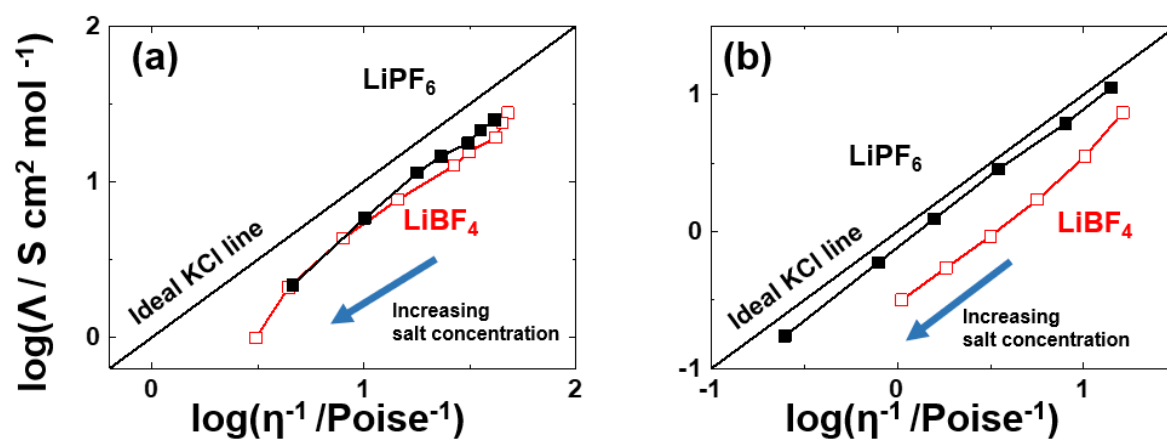

**Figure S1.** Walden plots of  $\text{LiPF}_6^-$  and  $\text{LiBF}_4^-$  (a) DMSO and (b) PC solutions at 298 K. (b, Reprinted with permission from Ref. 1, copyright 2018 American Chemical Society)

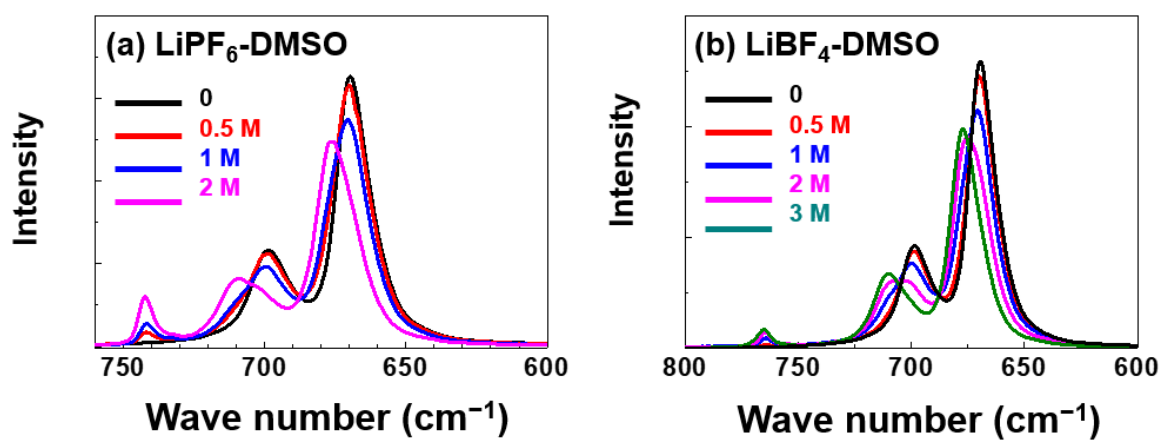

**Figure S2.** Raman spectra of DMSO solvent and anions in (a) LiPF<sub>6</sub>-DMSO and (b) LiBF<sub>4</sub>-DMSO as a function of salt concentration at 298 K.

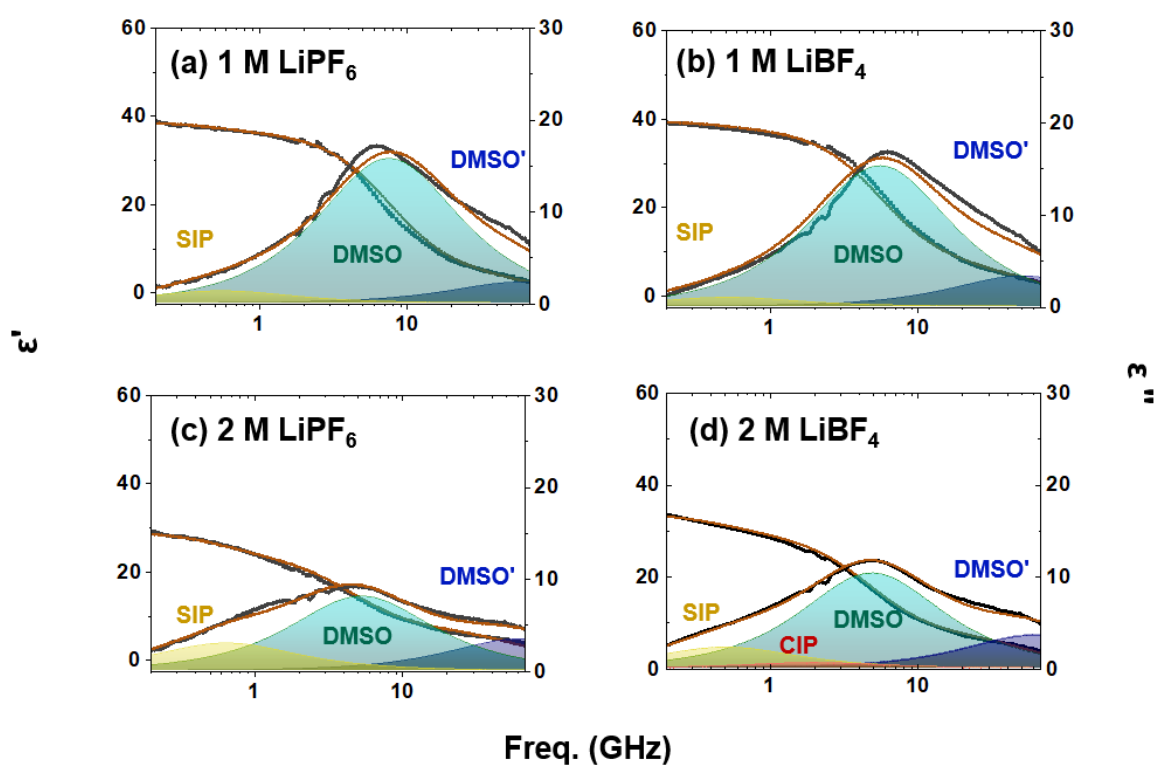

**Figure S3.** Permittivity  $\epsilon'(\nu)$  and dielectric loss  $\epsilon''(\nu)$  of (a) 1 M and (b) 2 M  $\text{LiPF}_6$ -DMSO, and (c) 1 M and (d) 2 M  $\text{LiBF}_4$ -DMSO at 298 K compared with the spectrum calculated with the Debye equation. The highlighted areas show the contributions of the SIP, CIP, and free DMSO solvent (DMSO and DMSO') relaxation process to  $\epsilon''(\nu)$ .

**Table S1.** Parameters used for deriving the concentrations of ion pairs using the Cavell equation.

| Ions/Solvent                                     |                              |       | Reference |
|--------------------------------------------------|------------------------------|-------|-----------|
| radius (r)<br>[Å]                                | Li <sup>+</sup>              | 0.69  | 2         |
|                                                  | PF <sub>6</sub> <sup>-</sup> | 2.45  | 2         |
|                                                  | BF <sub>4</sub> <sup>-</sup> | 2.30  | 2         |
|                                                  | PC                           | 2.76  | 3         |
|                                                  | DMSO                         | 2.73  | 4         |
| polarizability ( $\alpha$ )<br>[Å <sup>3</sup> ] | Li <sup>+</sup>              | 0.032 | 2         |
|                                                  | PF <sub>6</sub> <sup>-</sup> | 2.77* | —         |
|                                                  | BF <sub>4</sub> <sup>-</sup> | 2.77  | 2         |
|                                                  | PC                           | 8.55  | 5         |
|                                                  | DMSO                         | 8.28  | 4         |

\* Note that the polarizability of PF<sub>6</sub><sup>-</sup> is not available in the literature and is thus assumed to be the same as that of BF<sub>4</sub><sup>-</sup>.

\

### Deriving the concentration of ion pairs ( $C_{SIP}$ and $C_{CIP}$ ) from dielectric strength ( $S_{SIP}$ and $S_{CIP}$ )

The following equations are quoted from J. Barthel and R. Buchner's work.<sup>2</sup>

The concentration of ion pairs ( $C_{IP}$ ) can be derived from their dielectric strength ( $S_{IP}$ ) as below:

$$C_{IP} = \frac{2\varepsilon_s + 1}{\varepsilon_s} \frac{k_B T \varepsilon_0}{N_A} \frac{(1 - \alpha_{IP} f_{IP})}{\mu_{IP}} S_{IP} \quad (3)$$

where  $\mu_{IP}$  is the dipole moment,  $f_{IP}$  is the reaction-field factor, and  $\alpha_{IP}$  is the polarizability of the ion pair.

Here,  $f_{IP}$  is given by the following expression:

$$f_{IP} = \frac{3}{4\pi\varepsilon_0 ab^2} \frac{A(1-A)(\varepsilon_s - 1)}{\varepsilon_s + (1 - \varepsilon_s)A} \quad (4)$$

where  $A$  is

$$A = -\frac{1}{p^2 - 1} + \frac{p}{(p^2 - 1)^{1.5}} \ln(p + \sqrt{p^2 - 1}) \quad (5)$$

and  $p$  ( $= a/b$ ) is the ratio of major half-axis  $a = (r_{cation} + r_{anion} + h)/2$  to minor half-axis  $b = c = \max[r_{cation}, r_{anion}]$  of an ellipsoid, which is an appropriate structural assumption.<sup>2</sup> The  $r_{cation}$  and  $r_{anion}$  terms are the radius of cation and anion, respectively, and  $h$  is the distance between the ion centers ( $= r_{cation} + r_{anion} + 2nr_s$ ), where  $r_s$  is the radius of a solvent molecule and  $n$  is the number of solvent molecules between the cation and anion ( $n = 0$  for CIP and 1 for SIP).<sup>2</sup>

The polarizability of ion pairs,  $\alpha_{IP}$ , is estimated to be  $\alpha_{IP} = \alpha_{cation} + \alpha_{anion} + n\alpha_s$ , where  $\alpha_{cation}$ ,  $\alpha_{anion}$ , and  $\alpha_s$  are the polarizability of the cation, anion, and solvent, respectively. The radius and polarizabilities of the ions and solvent are taken from the literature.<sup>3-6</sup>

The dipole moment of ion pairs,  $\mu_{IP}$ , is given as below:

$$\mu_{IP} = \mu_0 - \mu_{ind} - n\mu_s \quad (6)$$

where  $\mu_0$  is the uncorrected dipole moment simply given by  $\mu_0 = z \cdot e_0 \cdot h$  for symmetric electrolytes, where  $z_{cation} = |z_{anion}| = z$  and  $e_0$  is the elementary charge.

The induced dipole moment,  $\mu_{\text{int}}$ , is given by the following equation.

$$\mu_{\text{ind}} = \frac{(4\pi\epsilon_0)h^4 e_0 (|z_{\text{anion}}| \alpha_{\text{cation}} + z_{\text{cation}} \alpha_{\text{anion}}) + 2h\alpha_{\text{cation}} \alpha_{\text{anion}} e_0 (|z_{\text{anion}}| + z_{\text{cation}})}{(4\pi\epsilon_0)h^6 - 4\alpha_{\text{cation}} \alpha_{\text{anion}}} \quad (7)$$

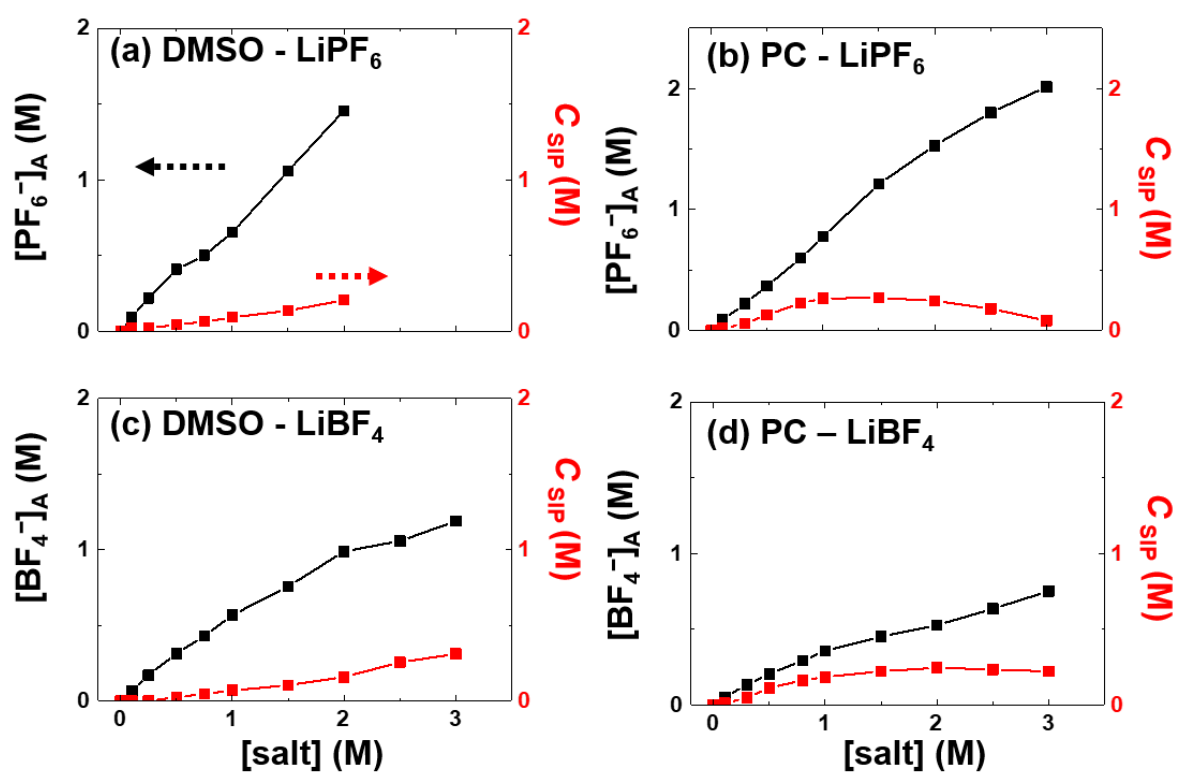

**Figure S4.** Comparison of the anion concentration obtained from Raman measurements and SIP concentration derived from the dielectric strength of DRS measurements:  $[PF_6^-]_A$  vs.  $C_{SIP}$  in (a) LiPF<sub>6</sub>-DMSO and (b) LiPF<sub>6</sub>-PC.  $[BF_4^-]_A$  vs.  $C_{SIP}$  in (c) LiBF<sub>4</sub>-DMSO and (d) LiBF<sub>4</sub>-PC. (b and d, Reprinted with permission from Ref. 1, copyright 2018 American Chemical Society)

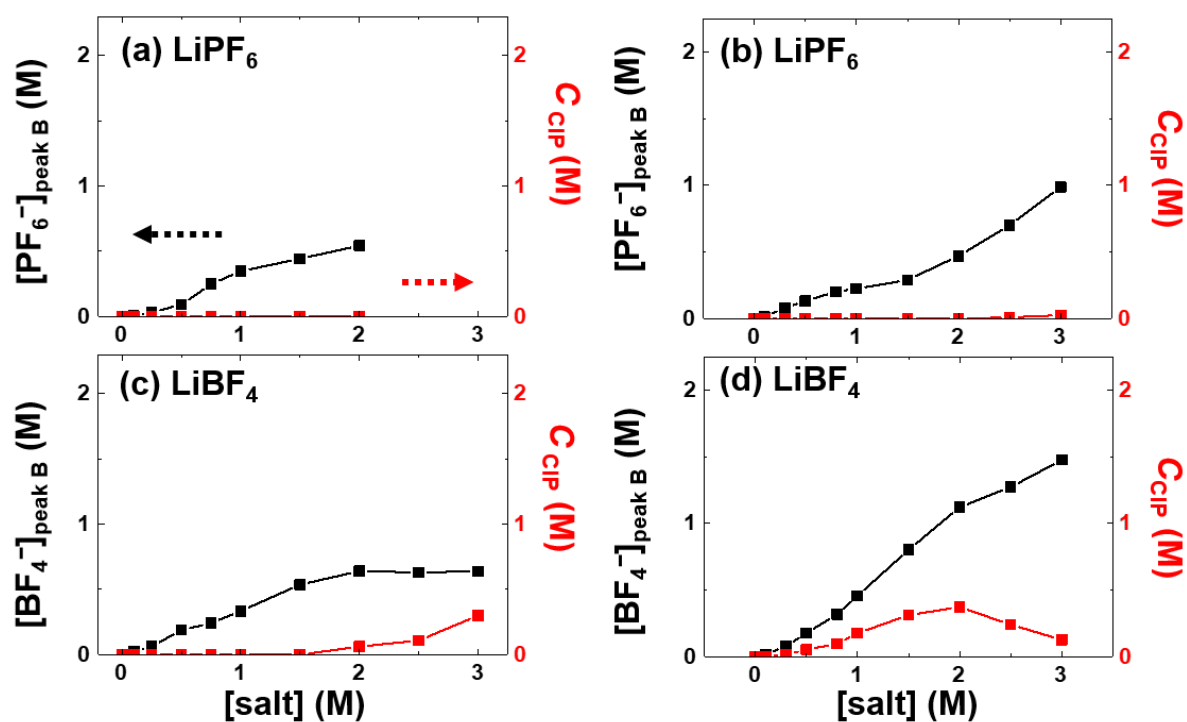

**Figure S5.** Comparison of the anion concentration obtained from Raman measurements and CIP concentration derived from the dielectric strength of DRS measurements:  $[PF_6^-]_B$  vs.  $C_{CIP}$  in (a) LiPF<sub>6</sub>–DMSO and (b) LiPF<sub>6</sub>–PC.  $[BF_4^-]_B$  vs.  $C_{CIP}$  in (c) LiBF<sub>4</sub>–DMSO and (d) LiBF<sub>4</sub>–PC. (b and d, Reprinted with permission from Ref. 1, copyright 2018 American Chemical Society)

**Table S2.** Experimental values of the PFG-NMR self-diffusion coefficients ( $10^{-10} \text{ m}^2 \text{ s}^{-1}$ ) for  $^1\text{H}$  (DMSO),  $^7\text{Li}$  (lithium ion), and  $^{19}\text{F}$  (anion) with various salt concentrations at 298 K.

| [salt] (M) | LiPF <sub>6</sub> -DMSO |               |                 | LiBF <sub>4</sub> -DMSO |               |                 |
|------------|-------------------------|---------------|-----------------|-------------------------|---------------|-----------------|
|            | $^1\text{H}$            | $^7\text{Li}$ | $^{19}\text{F}$ | $^1\text{H}$            | $^7\text{Li}$ | $^{19}\text{F}$ |
| 0          | 7.218                   | —             | —               | 7.516                   | —             | —               |
| 0.1        | 6.961                   | 3.170         | 6.216           | 7.309                   | 3.238         | 6.869           |
| 0.25       | 5.938                   | 3.121         | 5.653           | 6.627                   | 3.213         | 6.497           |
| 0.5        | 4.952                   | 2.702         | 4.671           | 6.096                   | 2.771         | 5.291           |
| 0.75       | 4.219                   | 2.333         | 4.081           | 5.326                   | 2.436         | 4.755           |
| 1.0        | 3.516                   | 1.947         | 3.402           | 4.951                   | 2.059         | 3.706           |
| 1.5        | 1.693                   | 1.021         | 1.570           | 3.008                   | 1.397         | 2.314           |
| 2.0        | 0.660                   | 0.414         | 0.567           | 1.424                   | 0.837         | 1.364           |
| 2.5        | —                       | —             | —               | 0.661                   | 0.444         | 0.644           |
| 3.0        | —                       | —             | —               | 0.320                   | 0.232         | 0.304           |

## References

- (1) Hwang, S.; Kim, D.-H.; Shin, J. H.; Jang, J. E.; Ahn, K. H.; Lee, C.; Lee, H., Ionic Conduction and Solution Structure in LiPF<sub>6</sub> and LiBF<sub>4</sub> Propylene Carbonate Electrolytes. *J. Phys. Chem. C* **2018**, *122*, 19438-19446.
- (2) Barthel, J.; Hetzenauer, H.; Buchner, R., Dielectric Relaxation of Aqueous Electrolyte Solutions. I. Solvent Relaxation of 1: 2, 2: 1, and 2: 2 Electrolyte Solutions. *Ber. Bunsenges. Phys. Chem.* **1992**, *96*, 988-997.
- (3) Marcus, Y., *Ion Properties*; CRC Press, 1997.
- (4) Pacak, P., Polarizability and Molecular Radius of Dimethyl-Sulfoxide and Dimethylformamide from Refractive Index Data. *J. Solution Chem.* **1987**, *16*, 71-77.
- (5) Ue, M., Mobility and Ionic Association of Lithium and Quaternary Ammonium Salts in Propylene Carbonate and  $\gamma$ -Butyrolactone. *J. Electrochem. Soc.* **1994**, *141*, 3336.
- (6) Bosque, R.; Sales, J., Polarizabilities of Solvents from the Chemical Composition. *J. Chem. Inf. Comput. Sci.* **2002**, *42*, 1154-1163.
